# Supplementary material for: Comprehensive analysis of LMNB2 in pan-cancer and identification of its biological role in sarcoma
Source: publisher site journal article supplement (doi:10.18632/aging.205962), 2024-07-08
Supplement: Supplementary file [file aging-v16-205962-supplementary-material-SD1.pdf]

**SUPPLEMENTARY FIGURES**

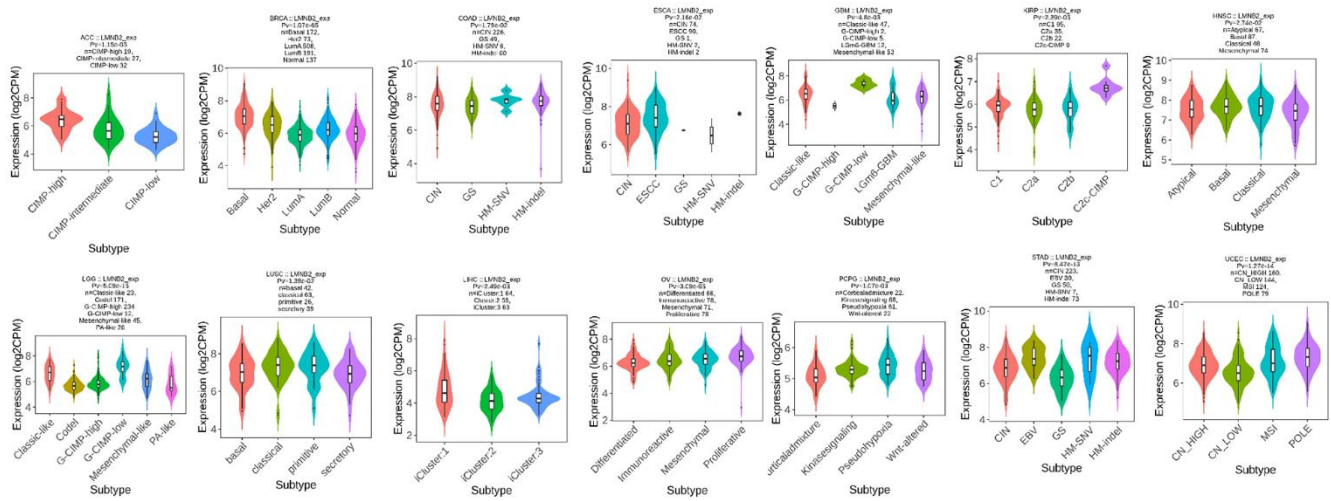

**Supplementary Figure 1. LMNB2 expression levels in different molecular subtypes of cancer are indicated.**

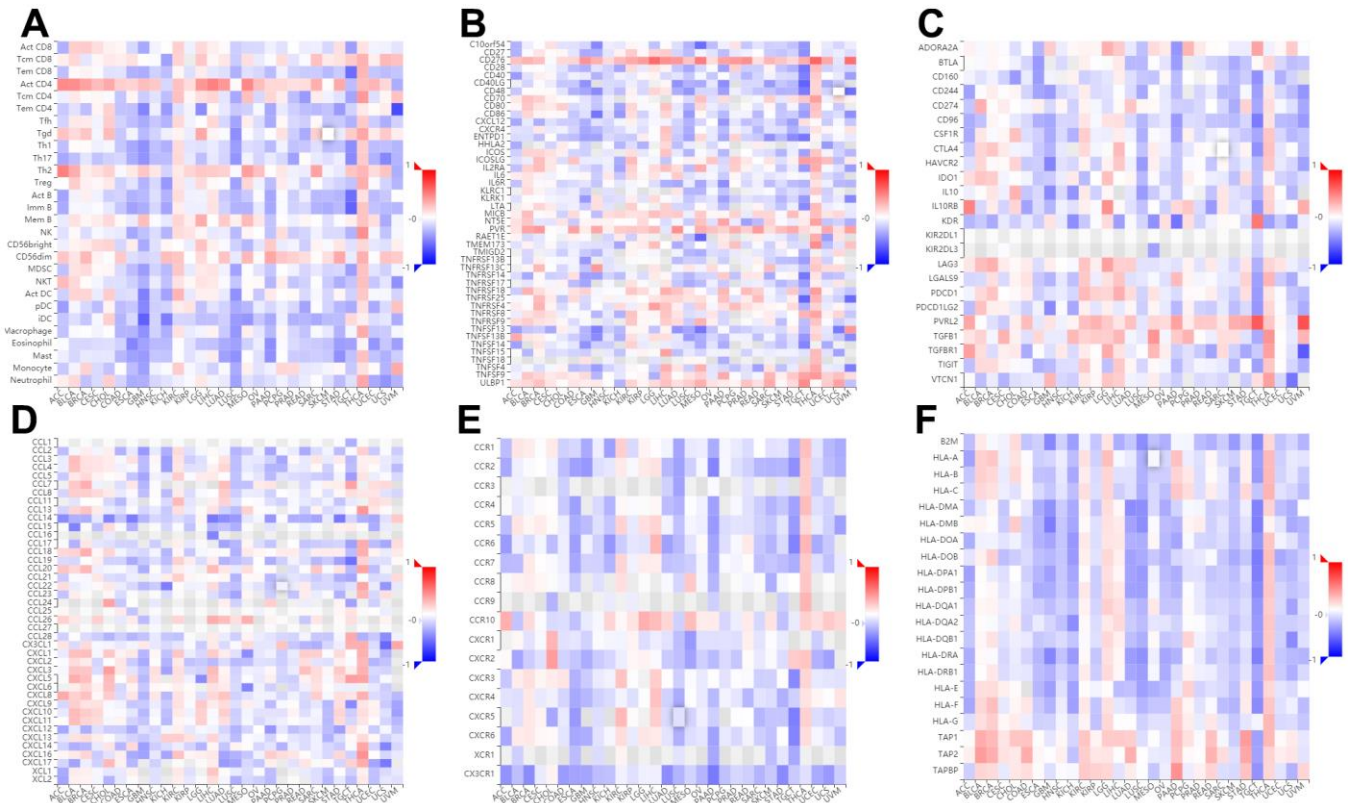

**Supplementary Figure 2. Relation between the (A) abundance of tumor-infiltrating lymphocytes; (B) immunostimulator; (C) Immunoinhibitor; (D) chemokines; (E) chemokine receptors and (F) MHC molecule and expression of LMNB2.**

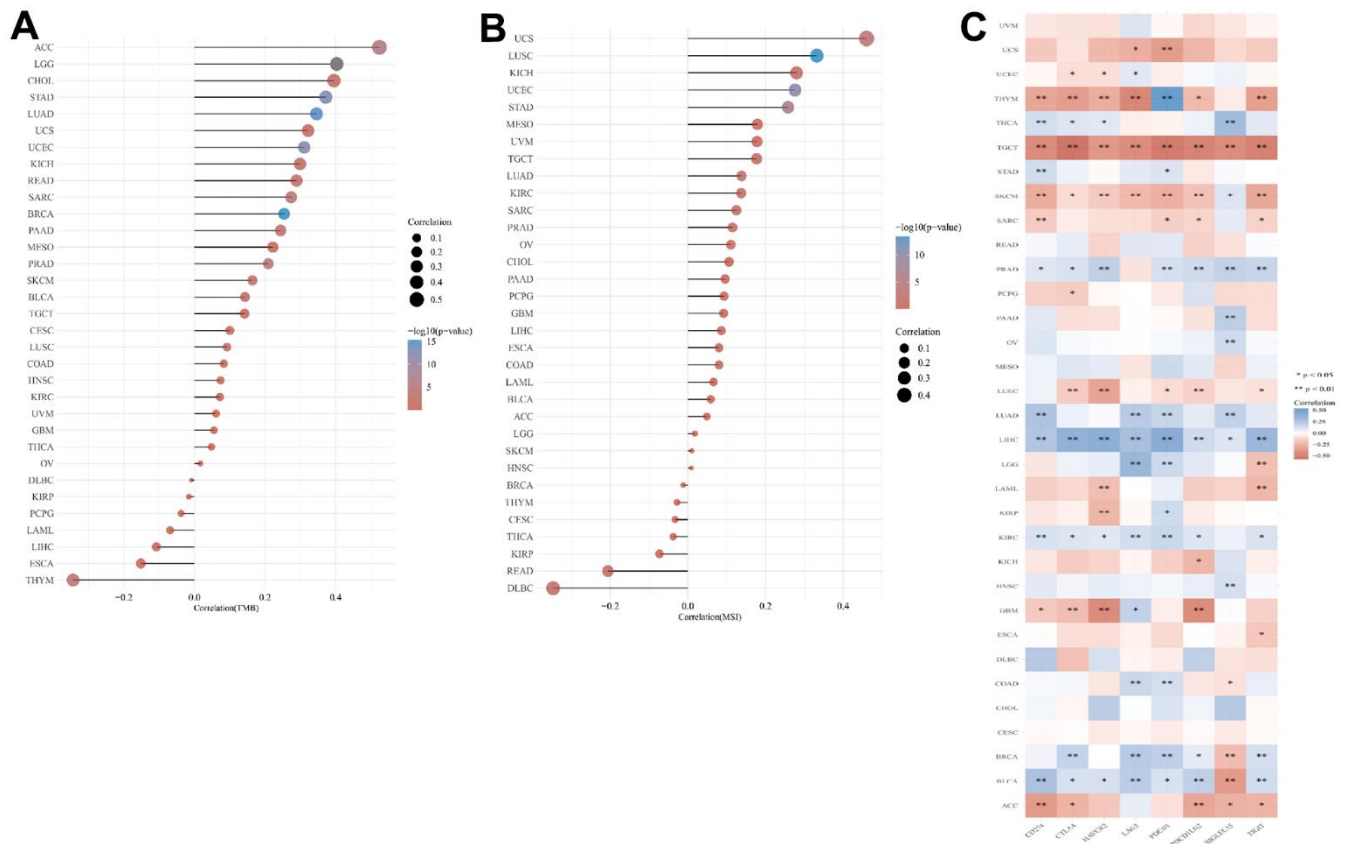

Supplementary Figure 3. Spearman correlation analysis of (A) TMB; (B) MSI and (C) immune markers and LMNB2 gene expression.

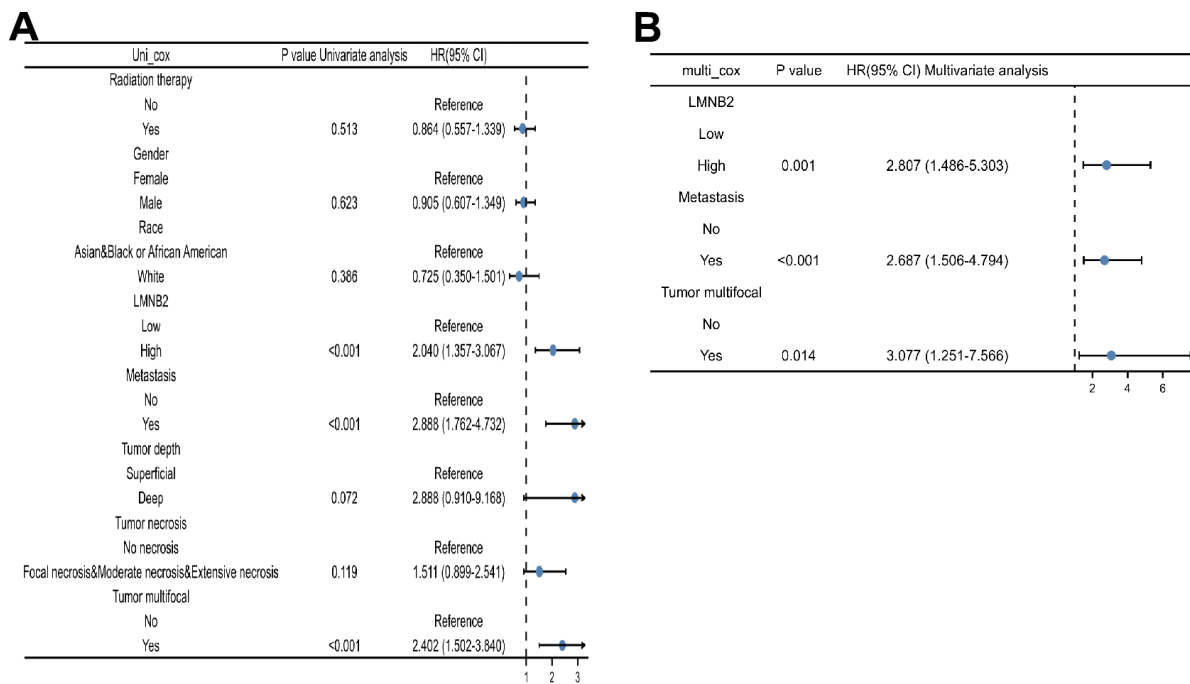

Supplementary Figure 4. Forest plot showing the (A) univariate Cox regression and (B) multivariate Cox regression analysis results in SARC patients.

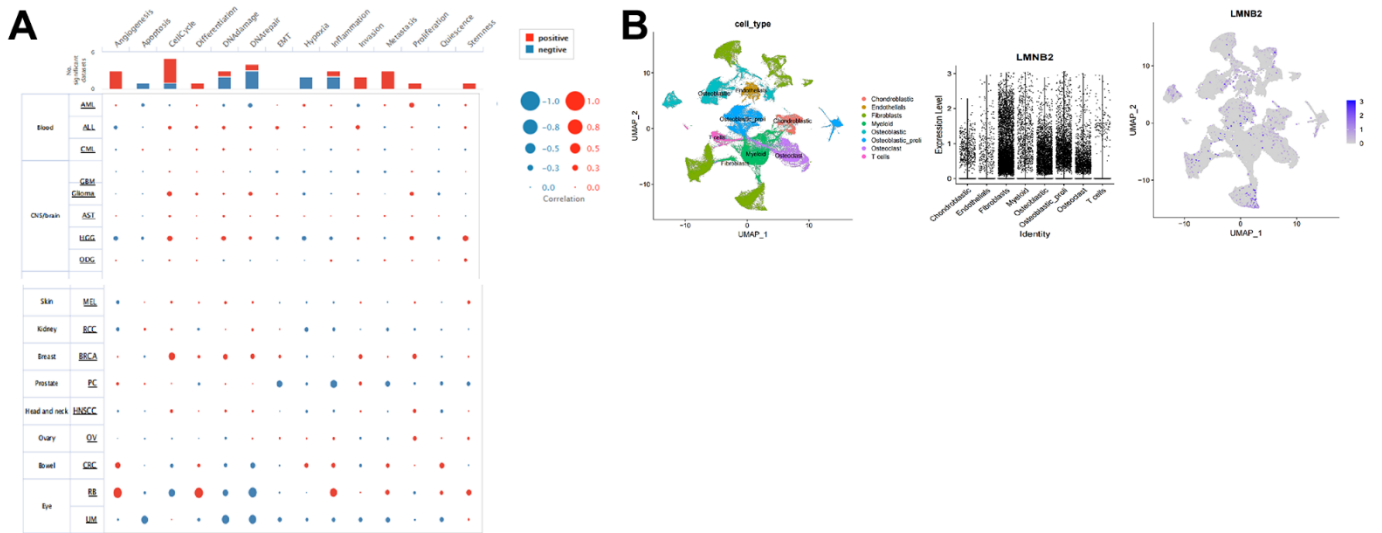

**Supplementary Figure 5. (A)** The expression levels of LMNB2 and its relationship with tumor functional status across different cancers in single cell, data from CancerSEA database. **(B)** The distribution of LMNB2 in TME of SARC tissues, data from GSE152048.

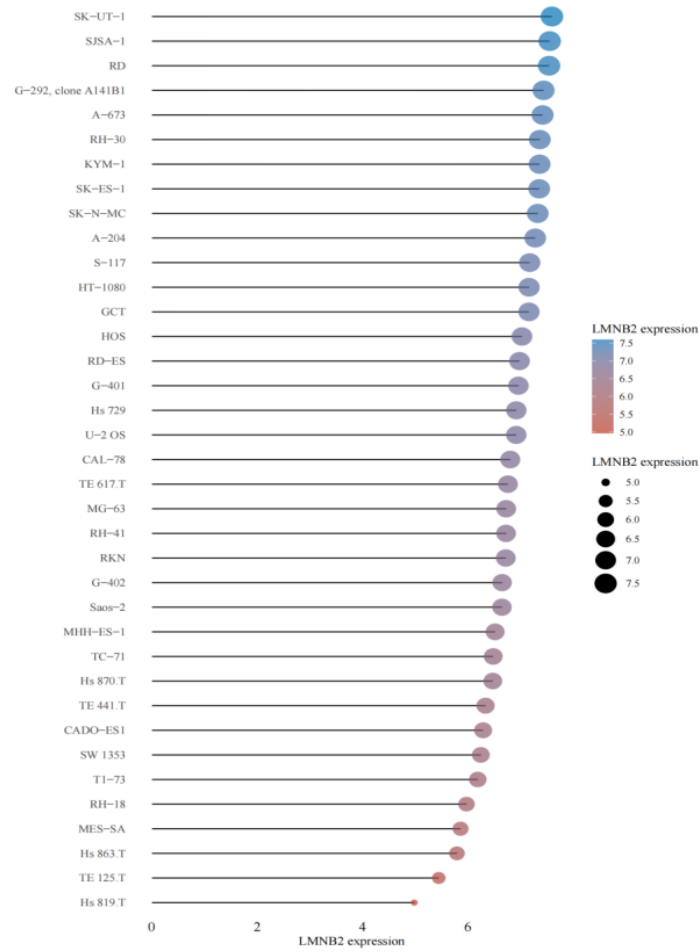

**Supplementary Figure 6. LMNB2 mRNA expression levels in different SARC cell lines were analyzed, data from CCLE dataset.**
